# Supplementary material for: Synthesis and properties of pH-cleavable toothbrush-like copolymers comprising multi-reactive Y junctions and a linear or cyclic backbone
Source: Royal Society of Chemistry journal article supplement (doi:10.1039/d0py00084a), 2020-01-01
Supplement: d0py00084a1.pdf [file d0py00084a1.pdf]

## Supporting Information

Synthesis and properties of pH-cleavable toothbrush-like copolymers comprising multi-reactive Y junctions and linear or cyclic backbone

Jian Zhang, Xiaomin Zhu, Cheng Miao, Yanzhe He and Youliang Zhao\*

Suzhou Key Laboratory of Macromolecular Design and Precision Synthesis, Jiangsu Key Laboratory of Advanced Functional Polymer Design and Application, State and Local Joint Engineering Laboratory for Novel Functional Polymeric Materials, College of Chemistry, Chemical Engineering and Materials Science, Soochow University, Suzhou 215123, China

E-mail: ylzhao@suda.edu.cn

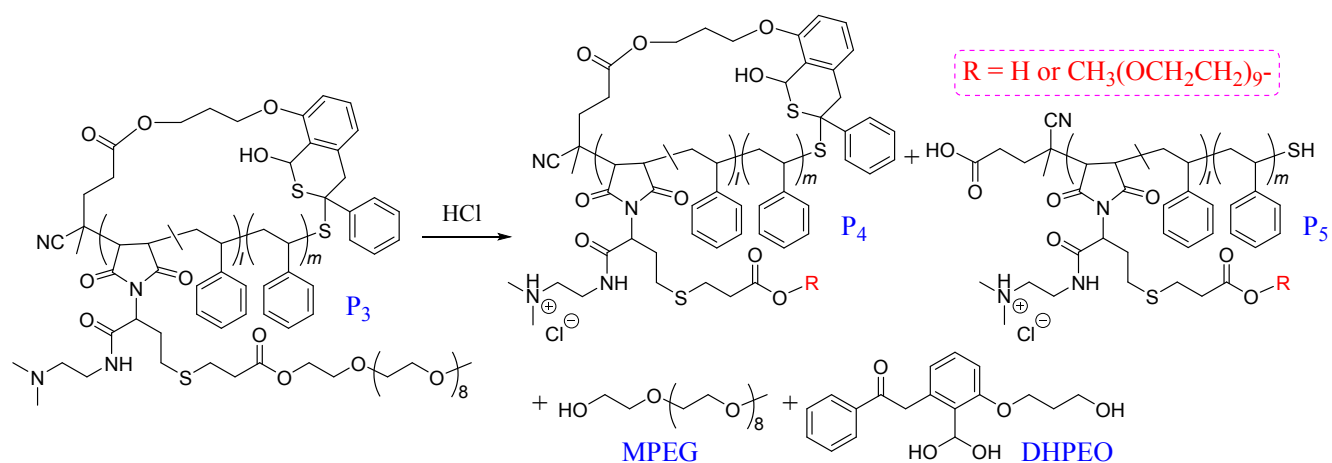

**Scheme S1** Main products obtained by acid-triggered hydrolysis of  $\text{P}_3$ , in which  $\text{P}_4$  with cyclic backbone and  $\text{P}_5$  with linear backbone have the average number of PEG grafts in the range of 0 and 6.

**Table S1** Results for synthesis of P(St-*co*-MTL) random copolymers and P(St-*co*-MTL)-*b*-PSt diblock copolymers via FBCP-mediated RAFT copolymerization of MTL with St<sup>a</sup>

| run | t (h) | $C_{\text{MTL}}^b$ | $C_{\text{St}}^b$ | $M_{n, \text{GPC}} \text{ (Da)}^c$ | $\text{Đ}^c$ | $m_{\text{MTL}}^d$ | $m_{\text{St}}^d$ | $M_{n, \text{NMR}} \text{ (Da)}^e$ |
|-----|-------|--------------------|-------------------|------------------------------------|--------------|--------------------|-------------------|------------------------------------|
| 1   | 0.5   | 0.30               | 0.012             | 820                                | 1.08         | 1.8                | 2.4               | 1060                               |
| 2   | 1     | 0.59               | 0.026             | 1500                               | 1.09         | 3.5                | 5.2               | 1690                               |
| 3   | 1.5   | 0.84               | 0.046             | 2230                               | 1.09         | 5.0                | 9.2               | 2400                               |
| 4   | 2     | 1                  | 0.060             | 2750                               | 1.10         | 6                  | 12                | 2890                               |
| 5   | 4     | 1                  | 0.100             | 3640                               | 1.10         | 6                  | 20                | 3720                               |
| 6   | 6     | 1                  | 0.130             | 4300                               | 1.09         | 6                  | 26                | 4350                               |
| 7   | 8     | 1                  | 0.155             | 4720                               | 1.09         | 6                  | 31                | 4870                               |
| 8   | 10    | 1                  | 0.175             | 5150                               | 1.09         | 6                  | 35                | 5280                               |
| 9   | 14    | 1                  | 0.210             | 5960                               | 1.07         | 6                  | 42                | 6010                               |
| 10  | 20    | 1                  | 0.260             | 6970                               | 1.08         | 6                  | 52                | 7050                               |

<sup>a</sup> Polymerization condition:  $[\text{St}]_0 : [\text{MTL}]_0 : [\text{FBCP}]_0 : [\text{AIBN}]_0 = 200 : 6 : 1 : 0.1$ ,  $[\text{St}]_0 + [\text{MTL}]_0 = 3.0 \text{ mol L}^{-1}$ , in DMSO- $d_6$  at 70 °C. <sup>b</sup> Monomer conversion determined by  $^1\text{H NMR}$  analysis. <sup>c</sup> Apparent molar mass ( $M_{n, \text{GPC}}$ ) and dispersity ( $\text{Đ}$ ) given by GPC analysis. <sup>d</sup> Number of monomer units determined by  $^1\text{H NMR}$  analysis. <sup>e</sup> Molar mass determined by  $^1\text{H NMR}$  analysis.

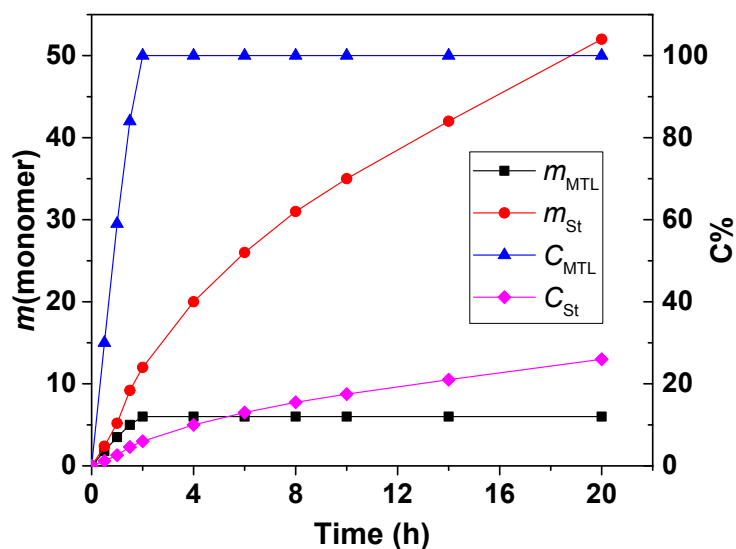

**Fig. S1** Influence of polymerization time on number of monomer unit ( $m$ ) and monomer conversion ( $C$ ) during FBCP-mediated RAFT copolymerization of MTL with St. See Table S1 for polymerization conditions.

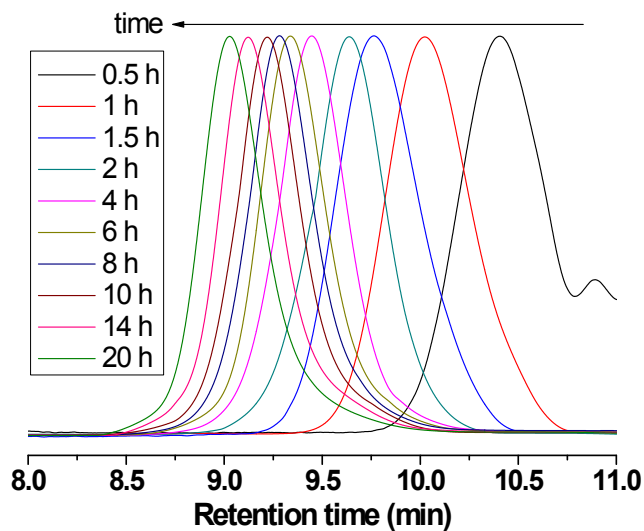

**Fig. S2** GPC traces of linear random and diblock copolymers synthesized by FBCP-mediated RAFT copolymerization of MTL with St. See Table S1 for polymerization conditions.

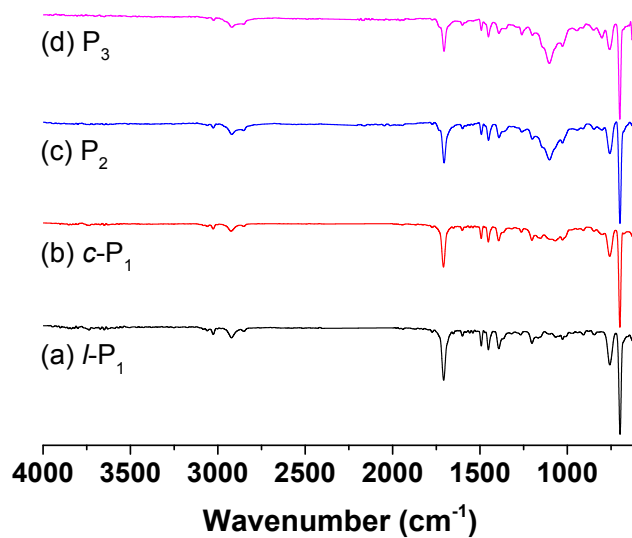

Fig. S3 FT-IR spectra of various copolymers.

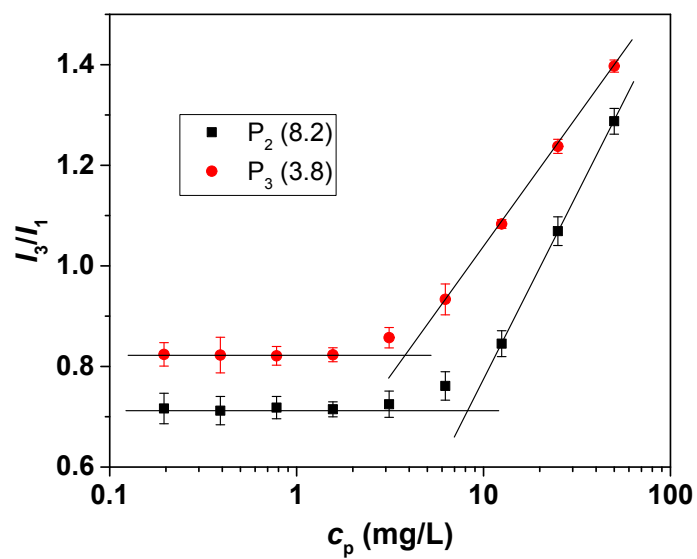

Fig. S4 Dependence of intensity ratios ( $I_3/I_1$ ) on logarithm of copolymer concentrations in aqueous solution.

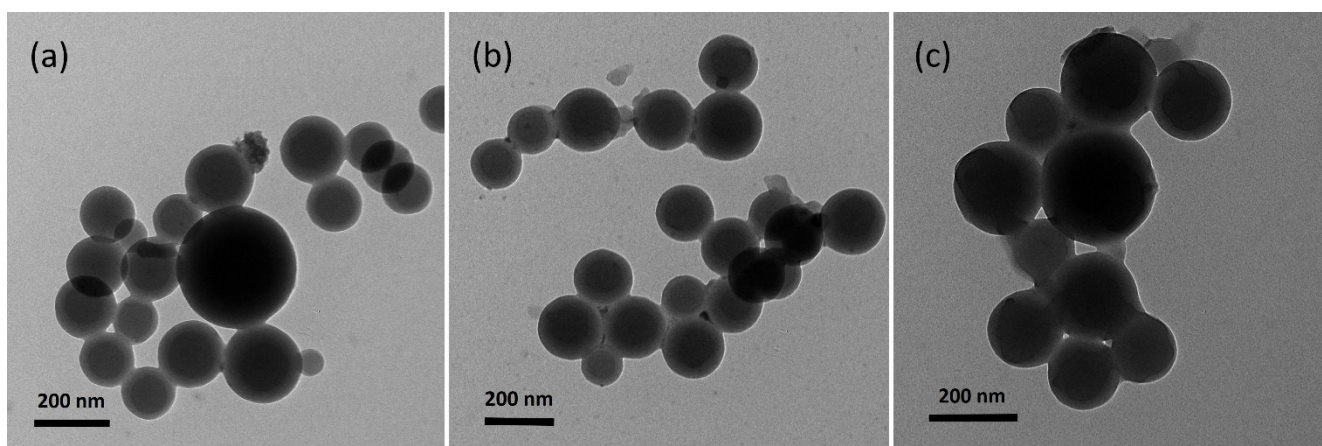

**Fig. S5** Influence of heat ( $T = 60\text{ }^{\circ}\text{C}$ , b) and sonication ( $T = 25\text{ }^{\circ}\text{C}$ , c) for 60 min on TEM images of  $\text{P}_2$  assemblies ( $c_p = 0.5\text{ mg mL}^{-1}$ ,  $\text{pH} = 7.2$ ), in which the original TEM image (a) was listed for comparison.

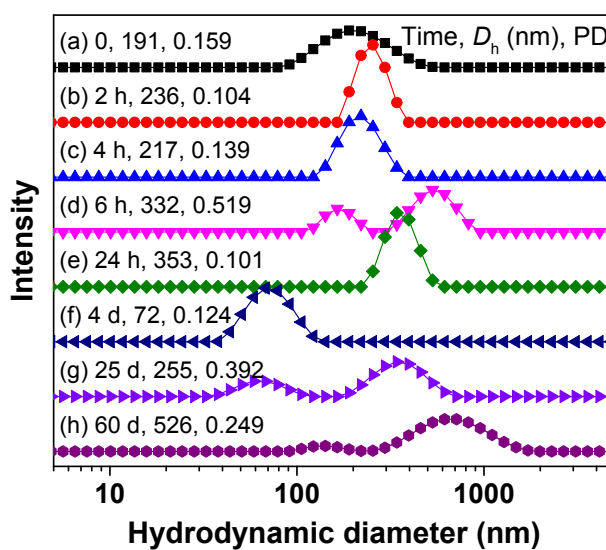

**Fig. S6** Influence of time on DLS plots of  $\text{P}_2$  assemblies ( $c_p = 0.5\text{ mg mL}^{-1}$ ) formed in aqueous solution at  $\text{pH} 7.2$  (a) and  $3.0$  (b-h).

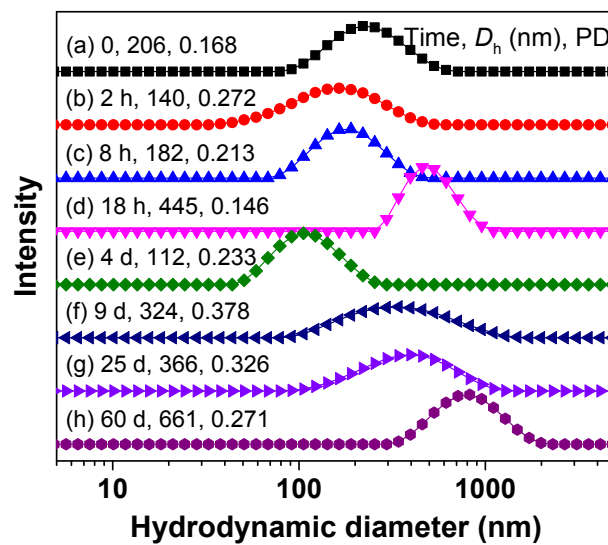

**Fig. S7** Influence of time on DLS plots of  $P_3$  assemblies ( $c_p = 0.5 \text{ mg mL}^{-1}$ ) formed in aqueous solution at pH 7.1 (a) and 3.0 (b-h).

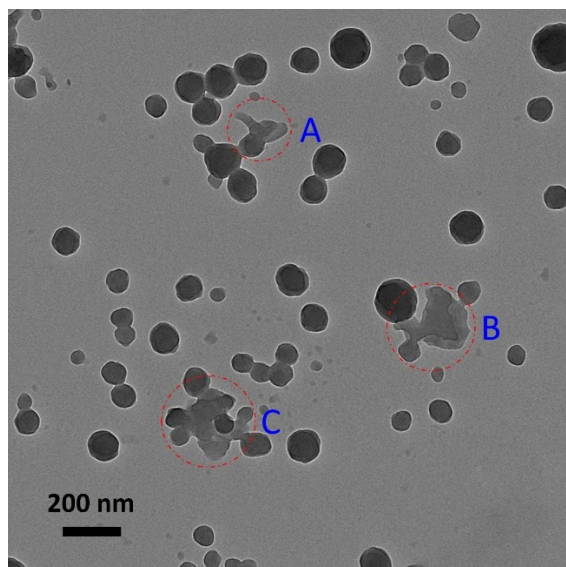

**Fig. S8** TEM image of  $P_3$  assemblies formed at pH 3.0 ( $c_p = 0.5 \text{ mg mL}^{-1}$ ,  $t = 2 \text{ h}$ ).

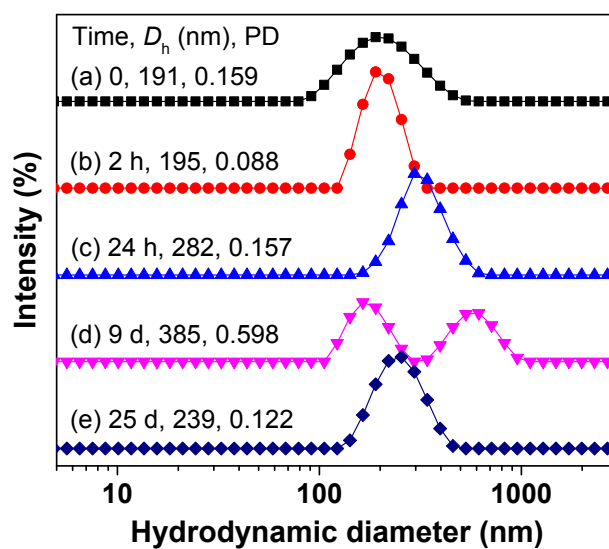

**Fig. S9** Influence of time on DLS plots of  $P_2$  assemblies ( $c_p = 0.5 \text{ mg mL}^{-1}$ ) formed in aqueous solution at pH 7.2 (a) and 10 (b-e).

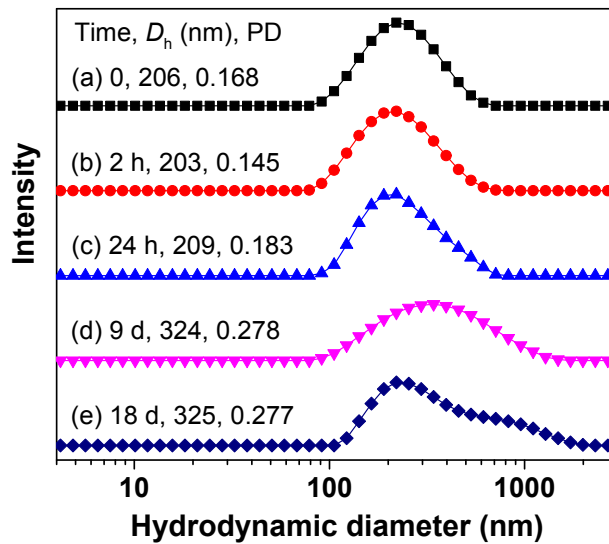

**Fig. S10** Influence of time on DLS plots of  $P_3$  assemblies ( $c_p = 0.5 \text{ mg mL}^{-1}$ ) formed in aqueous solution at pH 7.1 (a) and 10 (b-e).

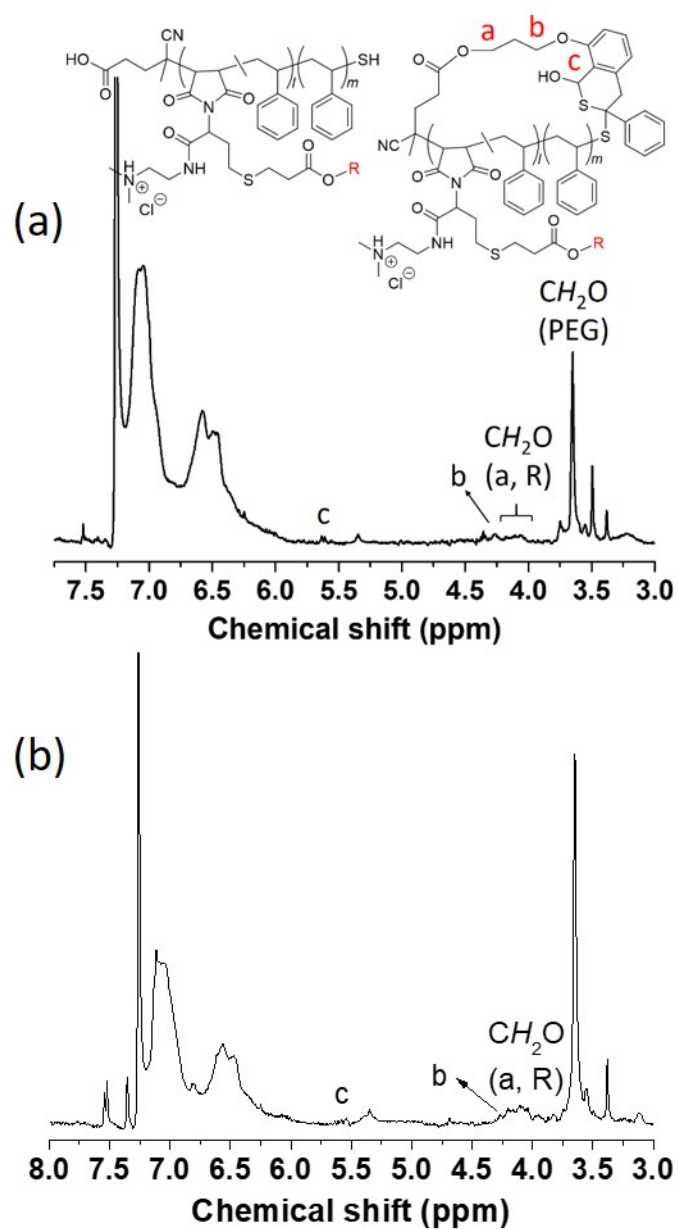

**Fig. S11**  $^1\text{H}$  NMR spectra of copolymer mixtures ( $\text{R} = \text{H}$  or  $\text{CH}_3(\text{OCH}_2\text{CH}_2)_9$ -) obtained by freeze-drying of  $\text{P}_3$  assemblies upon acid (pH = 3.0, t = 60 days, a) and base (pH = 10, t = 18 days, b) treatments, followed by precipitation to remove cleaved MPEG.



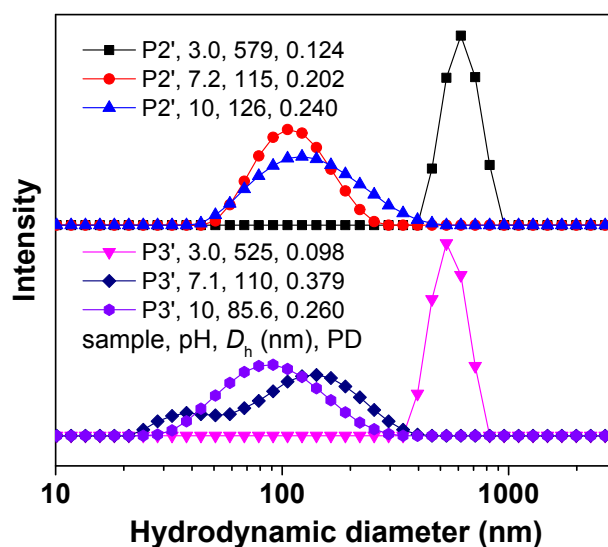

**Fig. S12** DLS plots of copolymer assemblies ( $c_p = 0.5 \text{ mg mL}^{-1}$ ) formed from P<sub>2</sub> and P<sub>3</sub> in aqueous solution upon pH and oxidation stimuli, where the samples upon oxidation of P<sub>2</sub> and P<sub>3</sub> were abbreviated as P<sub>2</sub>' and P<sub>3</sub>'.

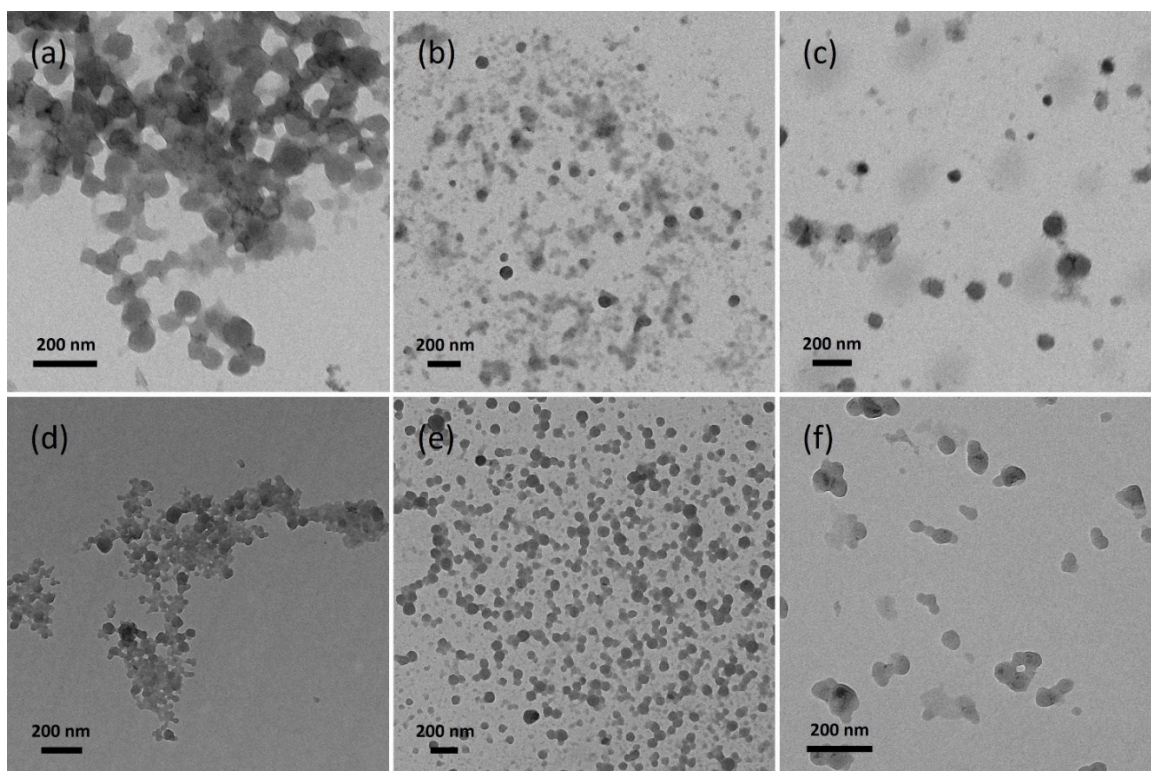

**Fig. S13** TEM images of copolymer assemblies ( $c_p = 0.5 \text{ mg mL}^{-1}$ ) formed from P<sub>2</sub>' and P<sub>3</sub>' in aqueous solution at different pHs (pH  $\approx$  3 (a, d), 7 (b, e) and 10 (c, f)).

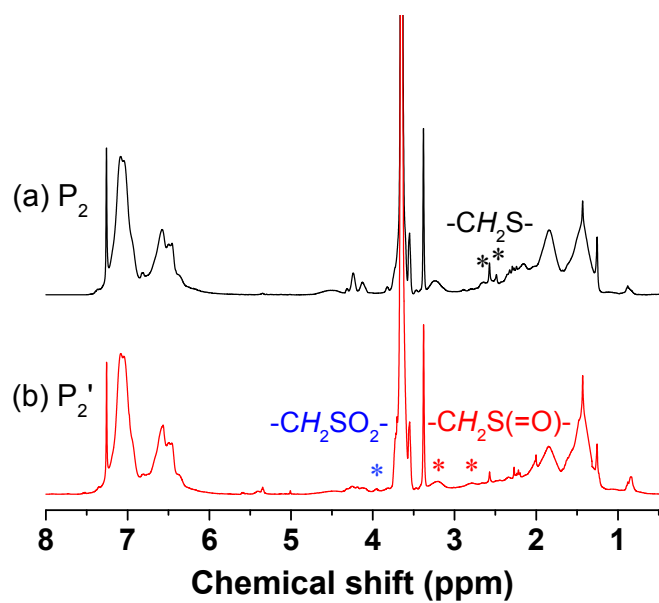

**Fig. S14** <sup>1</sup>H NMR spectra of P<sub>2</sub> (a) and P<sub>2</sub>' (b) recorded in CDCl<sub>3</sub>, in which the star labeled the signals of CH<sub>2</sub>S before and after oxidation, and the signal at 3.20 ppm of P<sub>2</sub>' was overlapped with other signals.
